# Supplementary material
Source: publisher figshare collection journal article supplement (https://aacr.figshare.com/articles/dataset/_/22366247)
Supplement: Supplementary file 1 [file 39811289]

**Renard *et al***

**Tbx3 is a downstream target of the Wnt/ $\beta$ -catenin pathway and a critical mediator of  $\beta$ -catenin survival functions in liver cancer**

**Legends to Supplementary Figures**

**Supplementary Figure 1**

Distribution of GS expression levels in 55 human HCCs (left panel) and in 24 hepatoblastomas (right panel) according to  $\beta$ -catenin status. Unlog values derived from Affymetrix microarray data are expressed in arbitrary units. In HCCs, mean expression values were significantly higher in tumors expressing mutant  $\beta$ -catenin (MUT) and in a group of 6 cases with wt  $\beta$ -catenin (WT, Wnt on) than in other tumors carrying wt  $\beta$ -catenin (WT, Wnt off) and normal liver (NL) ( $P < 0.0001$ ). Increase in GS expression in hepatoblastomas carrying mutant  $\beta$ -catenin compared to other tumors and normal liver levels is also significant ( $P < 0.011$ ). These data were validated by real time PCR.

**Supplementary Figure 2**

HuH7 hepatoma cells were infected with the lentiviral vector pTRIP- $\beta$ -catT41A or pTRIP-GFP as described previously (1). Cellular RNA was extracted at 48 h post-infection and analyzed by semi-quantitative RT-PCR, showing a marked increase of Tbx3 expression in cells expressing mutant  $\beta$ -catenin. We verified that the myc-tagged  $\beta$ -cateninT41A mutant was strongly expressed, and that other Wnt target genes such as MMP7 and IL-8 were upregulated together with Tbx3.

REFERENCE:

1. Levy L, Neuveut C, Renard CA, et al. Transcriptional Activation of Interleukin-8 by beta -Catenin-Tcf4. *J Biol Chem* 2002;277:42386-93

**Supplementary Figure 3**

The Tbx3 promoter is responsive to  $\beta$ -catenin in 293 cells.

The ability of mutated, constitutively stabilized  $\beta$ -catenin to activate the Tbx3 promoter was investigated in 293 cells, in which no alteration of the Wnt pathway has been evidenced. Cells were transfected with 0.5  $\mu$ g of L-Tbx3-LUC and 1  $\mu$ g of T41A  $\beta$ -catenin, along with 1  $\mu$ g of Tcf4 or 2  $\mu$ g of  $\Delta$ NTcf4 vector. Luciferase activity was measured 48 h post transfection.

**Supplementary Figure 4**

Apoptotic effect of siRNA-mediated depletion of  $\beta$ -catenin or Tbx3 in U2OS cells.

Cells were co-transfected with 2  $\mu$ g of  $\beta$ -cateninT41A vector or empty vector and 100 nM of siRNA for  $\beta$ -catenin, Tbx3 or luciferase as indicated. After 24 h, cells were treated or not with 500 ng/ml doxorubicin and harvested 24 h later. Total protein extracts were analyzed by Western blot with anti-PARP antibody, and apoptosis was measured by quantification of cleaved/uncleaved (C/NC) PARP ratios using Syngene Photo Image System.

Note that Tbx3 siRNA, as well as  $\beta$ -catenin siRNA, have apoptotic properties both in the presence and in the absence of doxorubicin treatment.
